# Supplementary material for: Engaging with change: Information and communication technology professionals’ perspectives on change at the mid-point in the UK/EU Brexit process
Source: PLoS One. 2020 Jan 6;15(1):e0227089. doi: 10.1371/journal.pone.0227089 (PMC6944360; doi:10.1371/journal.pone.0227089)
Supplement: S4 Table — (XLS) [file pone.0227089.s007.xls]

## Sheet: Question 1
In which region do you reside?	In which region do you reside?	In which region do you reside?	In which region do you reside?
Answer Options	Answer Options	Response Percent	Response Count
UK	Northern Ireland	0.64	156
EU excluding UK	Scotland	0.075	19
Rest of Europe exc. EU	Wales	0.085	21
Other	London	0.2	49
			245
